# Supplementary material
Source: PubMed Central journal article supplement (PMC4097760)
Supplement: JCM.03329-13_zjm007143524so1.pdf [file JCM.03329-13_zjm007143524so1.pdf]

1 **Supplementary Table 1:** Allelic profile of 101 *S. gallolyticus* subsp. *gallolyticus* strains

| isolate          | allelic profile |             |             |             |            |             |            |             | origin  | source              | year | country   |
|------------------|-----------------|-------------|-------------|-------------|------------|-------------|------------|-------------|---------|---------------------|------|-----------|
|                  | ST              | <i>glgB</i> | <i>aroE</i> | <i>nifS</i> | <i>p20</i> | <i>uvrA</i> | <i>tkl</i> | <i>trpD</i> |         |                     |      |           |
| DSM 16831        | 1               | 1           | 1           | 1           | 1          | 1           | 1          | 1           | koala   | feces               | 1990 | Australia |
| DSM 13808        | 2               | 2           | 2           | 2           | 2          | 2           | 2          | 2           | unknown | environment         | 1997 | Africa    |
| Isolate12932/01  | 3               | 3           | 3           | 3           | 3          | 3           | 3          | 3           | human   | heart valve culture | 2001 | Germany   |
| Isolate000718/98 | 4               | 4           | 4           | 3           | 4          | 4           | 1          | 4           | human   | heart valve culture | 1998 | Germany   |
| Isolate010288/01 | 3               | 3           | 3           | 3           | 3          | 3           | 3          | 3           | human   | heart valve culture | 2001 | Germany   |
| Isolate003080/00 | 5               | 5           | 4           | 4           | 5          | 5           | 4          | 4           | human   | heart valve culture | 2000 | Germany   |
| Isolate010672/01 | 6               | 5           | 5           | 4           | 6          | 5           | 5          | 5           | human   | heart valve culture | 2001 | Germany   |
| Isolate006718/00 | 7               | 4           | 4           | 3           | 5          | 5           | 4          | 4           | human   | heart valve culture | 2000 | Germany   |
| Isolate007849/02 | 8               | 4           | 4           | 3           | 4          | 3           | 1          | 4           | human   | heart valve culture | 2002 | Germany   |
| Isolate021702/06 | 9               | 5           | 4           | 5           | 5          | 5           | 6          | 6           | human   | heart valve culture | 2006 | Germany   |
| ATCC 49475       | 8               | 4           | 4           | 3           | 4          | 3           | 1          | 4           | unknown | clinical isolate    | 1992 | USA       |
| ATCC 49147       | 7               | 4           | 4           | 3           | 5          | 5           | 4          | 4           | unknown | clinical isolate    | 1992 | Germany   |
| 0134257/1        | 6               | 5           | 5           | 4           | 6          | 5           | 5          | 5           | human   | heart valve culture | 2001 | Germany   |

| isolate            | allelic profile |             |             |             |            |             |            |             | origin  | source              | year | country              |
|--------------------|-----------------|-------------|-------------|-------------|------------|-------------|------------|-------------|---------|---------------------|------|----------------------|
|                    | ST              | <i>glgB</i> | <i>aroE</i> | <i>nifS</i> | <i>p20</i> | <i>uvrA</i> | <i>tkt</i> | <i>trpD</i> |         |                     |      |                      |
| ATCC 9809          | 10              | 6           | 4           | 6           | 7          | 6           | 7          | 7           | unknown | unknown             | 1977 | United Kingdom       |
| Isolate005950/03   | 11              | 4           | 4           | 3           | 4          | 3           | 1          | 8           | human   | heart valve culture | 2003 | Germany              |
| ATCC BAA-2069      | 6               | 5           | 5           | 4           | 6          | 5           | 5          | 5           | human   | heart valve culture | 2001 | Germany              |
| K6236/35_MS        | 12              | 4           | 4           | 3           | 6          | 5           | 5          | 4           | human   | blood culture       | -    | unknown              |
| 05WDK 43740<br>002 | 13              | 7           | 6           | 4           | 8          | 7           | 8          | 1           | calf    | unknown             | -    | unknown              |
| AC 6860            | 14              | 5           | 5           | 4           | 6          | 5           | 9          | 5           | human   | clinical isolate    | -    | Germany <sup>1</sup> |
| AC 1016            | 15              | 5           | 4           | 4           | 6          | 5           | 5          | 4           | human   | clinical isolate    | -    | Germany <sup>1</sup> |
| AC 1135            | 8               | 4           | 4           | 3           | 4          | 3           | 1          | 4           | human   | clinical isolate    | -    | Germany <sup>1</sup> |
| AC 1181            | 16              | 4           | 4           | 3           | 4          | 3           | 4          | 4           | human   | clinical isolate    | -    | Germany <sup>1</sup> |
| AC 1242            | 8               | 4           | 4           | 3           | 4          | 3           | 1          | 4           | human   | clinical isolate    | -    | Germany <sup>1</sup> |
| AC 582             | 7               | 4           | 4           | 3           | 5          | 5           | 4          | 4           | human   | clinical isolate    | -    | Germany <sup>1</sup> |
| AC 7070            | 17              | 8           | 7           | 7           | 9          | 8           | 10         | 9           | human   | clinical isolate    | -    | Germany <sup>1</sup> |

| isolate   | allelic profile |             |             |             |            |             |            |             | origin    | source           | year | country              |
|-----------|-----------------|-------------|-------------|-------------|------------|-------------|------------|-------------|-----------|------------------|------|----------------------|
|           | ST              | <i>glgB</i> | <i>aroE</i> | <i>nifS</i> | <i>p20</i> | <i>uvrA</i> | <i>tkt</i> | <i>trpD</i> |           |                  |      |                      |
| AC 6827   | 18              | 5           | 4           | 4           | 10         | 5           | 11         | 4           | human     | clinical isolate | -    | Germany <sup>1</sup> |
| LMG 14621 | 19              | 9           | 8           | 8           | 11         | 9           | 1          | 1           | pigeon    | abscess          | 1994 | Belgium              |
| LMG 14622 | 19              | 9           | 8           | 8           | 11         | 9           | 1          | 1           | pigeon    | unknown          | 1994 | Belgium              |
| LMG 14623 | 20              | 10          | 8           | 9           | 11         | 9           | 1          | 1           | pigeon    | liver            | 1994 | Belgium              |
| LMG 14634 | 7               | 4           | 4           | 3           | 5          | 5           | 4          | 4           | cattle    | intestine        | 1994 | Belgium              |
| LMG 14821 | 21              | 11          | 9           | 10          | 12         | 10          | 12         | 10          | pigeon    | unknown          | 1994 | Belgium              |
| LMG 14823 | 22              | 11          | 9           | 11          | 12         | 11          | 12         | 11          | pigeon    | unknown          | 1994 | Belgium              |
| LMG 14855 | 23              | 8           | 10          | 12          | 13         | 3           | 1          | 12          | horse     | intestine        | 1994 | Belgium              |
| LMG 14856 | 24              | 8           | 10          | 12          | 13         | 3           | 13         | 12          | horse     | intestine        | 1994 | Belgium              |
| LMG 14870 | 25              | 6           | 11          | 6           | 14         | 10          | 14         | 7           | cattle    | intestine        | 1994 | Belgium              |
| LMG 14876 | 26              | 3           | 3           | 3           | 3          | 3           | 8          | 13          | cattle    | tonsil           | 1994 | Belgium              |
| LMG 14878 | 19              | 9           | 8           | 8           | 11         | 9           | 1          | 1           | pigeon    | lung             | 1994 | Belgium              |
| LMG 15572 | 27              | 12          | 2           | 13          | 15         | 9           | 8          | 14          | wild goat | rumen            | 1994 | Australia            |
| LMG 15573 | 27              | 12          | 2           | 13          | 15         | 9           | 8          | 14          | wild goat | rumen            | 1994 | Australia            |

| isolate   | allelic profile |             |             |             |            |             |            |             | origin | source        | year | country        |
|-----------|-----------------|-------------|-------------|-------------|------------|-------------|------------|-------------|--------|---------------|------|----------------|
|           | ST              | <i>glgB</i> | <i>aroE</i> | <i>nifS</i> | <i>p20</i> | <i>uvrA</i> | <i>tkt</i> | <i>trpD</i> |        |               |      |                |
| LMG 16005 | 3               | 3           | 3           | 3           | 3          | 3           | 3          | 3           | cattle | intestine     | 1995 | Belgium        |
| LMG 17956 | 28              | 4           | 12          | 14          | 16         | 12          | 7          | 4           | calf   | unknown       | 1997 | Netherlands    |
| LMG 22782 | 17              | 8           | 7           | 7           | 9          | 8           | 10         | 9           | dog    | unknown       | 2000 | Belgium        |
| LMG 14625 | 5               | 5           | 4           | 4           | 5          | 5           | 4          | 4           | human  | blood culture | 1994 | Belgium        |
| LMG 14631 | 29              | 5           | 4           | 4           | 6          | 5           | 5          | 5           | human  | blood culture | 1994 | Belgium        |
| LMG 14632 | 30              | 5           | 4           | 4           | 5          | 5           | 4          | 15          | human  | blood culture | 1994 | Belgium        |
| LMG 14879 | 19              | 9           | 8           | 8           | 11         | 9           | 1          | 1           | pigeon | lung          | 1994 | Belgium        |
| LMG 15049 | 12              | 4           | 4           | 3           | 6          | 5           | 5          | 4           | cattle | food          | 1970 | United Kingdom |
| LMG 15053 | 31              | 4           | 13          | 3           | 4          | 3           | 1          | 1           | cattle | unknown       | 1977 | United Kingdom |
| LMG 15063 | 12              | 4           | 4           | 3           | 6          | 5           | 5          | 4           | cattle | rumen         | 1982 | United Kingdom |
| LMG 17082 | 32              | 11          | 9           | 10          | 12         | 3           | 12         | 11          | cattle | tonsil        | 1996 | Belgium        |

| isolate   | allelic profile |             |             |             |            |             |            |             | origin  | source           | year | country            |
|-----------|-----------------|-------------|-------------|-------------|------------|-------------|------------|-------------|---------|------------------|------|--------------------|
|           | ST              | <i>glgB</i> | <i>aroE</i> | <i>nifS</i> | <i>p20</i> | <i>uvrA</i> | <i>tkt</i> | <i>trpD</i> |         |                  |      |                    |
| LMG 17091 | 33              | 11          | 9           | 10          | 12         | 13          | 12         | 11          | calf    | tonsil           | 1996 | Belgium            |
| Sp 001    | 34              | 5           | 4           | 4           | 17         | 5           | 12         | 4           | unknown | clinical isolate | -    | Spain <sup>2</sup> |
| Sp 006    | 35              | 13          | 2           | 15          | 18         | 14          | 14         | 16          | unknown | clinical isolate | -    | Spain <sup>2</sup> |
| Sp 012    | 7               | 4           | 4           | 3           | 5          | 5           | 4          | 4           | unknown | clinical isolate | -    | Spain <sup>2</sup> |
| Sp 014    | 36              | 3           | 3           | 16          | 3          | 3           | 8          | 13          | unknown | clinical isolate | -    | Spain <sup>2</sup> |
| Sp 015    | 5               | 5           | 4           | 4           | 5          | 5           | 4          | 4           | unknown | clinical isolate | -    | Spain <sup>2</sup> |
| Sp 020    | 7               | 4           | 4           | 3           | 5          | 5           | 4          | 4           | unknown | clinical isolate | -    | Spain <sup>2</sup> |
| Sp 023    | 37              | 8           | 2           | 17          | 19         | 14          | 15         | 4           | unknown | clinical isolate | -    | Spain <sup>2</sup> |
| Sp 029    | 38              | 4           | 14          | 3           | 4          | 3           | 1          | 4           | unknown | clinical isolate | -    | Spain <sup>2</sup> |
| Sp 030    | 39              | 6           | 4           | 6           | 5          | 5           | 4          | 4           | unknown | clinical isolate | -    | Spain <sup>2</sup> |
| Sp 036    | 26              | 3           | 3           | 3           | 3          | 3           | 8          | 13          | unknown | clinical isolate | -    | Spain <sup>2</sup> |
| Sp 042    | 5               | 5           | 4           | 4           | 5          | 5           | 4          | 4           | unknown | clinical isolate | -    | Spain <sup>2</sup> |
| Sp 043    | 17              | 8           | 7           | 7           | 9          | 8           | 10         | 9           | unknown | clinical isolate | -    | Spain <sup>2</sup> |
| Sp 050    | 6               | 5           | 5           | 4           | 6          | 5           | 5          | 5           | unknown | clinical isolate | -    | Spain <sup>2</sup> |

| isolate      | allelic profile |             |             |             |            |             |            |             | origin  | source                      | year        | country              |
|--------------|-----------------|-------------|-------------|-------------|------------|-------------|------------|-------------|---------|-----------------------------|-------------|----------------------|
|              | ST              | <i>glgB</i> | <i>aroE</i> | <i>nifS</i> | <i>p20</i> | <i>uvrA</i> | <i>tkt</i> | <i>trpD</i> |         |                             |             |                      |
| Sp 052       | 40              | 7           | 4           | 4           | 20         | 7           | 8          | 1           | unknown | clinical isolate            | -           | Spain <sup>2</sup>   |
| Sp 053       | 5               | 5           | 4           | 4           | 5          | 5           | 4          | 4           | unknown | clinical isolate            | -           | Spain <sup>2</sup>   |
| UCN 34       | 41              | 4           | 4           | 3           | 5          | 5           | 4          | 17          | human   | unknown                     | 2001        | France               |
| 904          | 11              | 4           | 4           | 3           | 4          | 3           | 1          | 8           | human   | unknown                     | -           | Korea                |
| 99146B3313   | 42              | 4           | 4           | 3           | 21         | 3           | 1          | 4           | human   | blood culture               | 2011        | Germany <sup>3</sup> |
| Isolate52 F2 | 43              | 4           | 4           | 3           | 5          | 5           | 4          | 16          | human   | feces                       | 2012        | Germany              |
| Isolate52 G9 | 43              | 4           | 4           | 3           | 5          | 5           | 4          | 16          | human   | feces                       | 2012        | Germany              |
| 99208B2062   | 44              | 14          | 4           | 3           | 4          | 3           | 1          | 4           | human   | blood culture               | 2012        | Germany <sup>3</sup> |
| ATCC 43143   | 12              | 4           | 4           | 3           | 6          | 5           | 5          | 4           | human   | blood culture               | before 1985 | Belgium              |
| HDZ 1001     | 45              | 4           | 14          | 18          | 22         | 8           | 5          | 13          | pigeon  | feces from pigeon<br>loft 1 | 2012        | Germany              |
| HDZ 1002     | 46              | 4           | 14          | 18          | 22         | 5           | 5          | 13          | pigeon  | feces from pigeon<br>loft 1 | 2012        | Germany              |

| isolate  | allelic profile |             |             |             |            |             |            |             | origin | source                      | year | country |
|----------|-----------------|-------------|-------------|-------------|------------|-------------|------------|-------------|--------|-----------------------------|------|---------|
|          | ST              | <i>glgB</i> | <i>aroE</i> | <i>nifS</i> | <i>p20</i> | <i>uvrA</i> | <i>tkt</i> | <i>trpD</i> |        |                             |      |         |
| HDZ 1003 | 47              | 5           | 14          | 18          | 22         | 8           | 5          | 13          | pigeon | feces from pigeon<br>loft 1 | 2012 | Germany |
| HDZ 1004 | 45              | 4           | 14          | 18          | 22         | 8           | 5          | 13          | pigeon | feces from pigeon<br>loft 1 | 2012 | Germany |
| HDZ 1005 | 45              | 4           | 14          | 18          | 22         | 8           | 5          | 13          | pigeon | feces from pigeon<br>loft 1 | 2012 | Germany |
| HDZ 1006 | 45              | 4           | 14          | 18          | 22         | 8           | 5          | 13          | pigeon | feces from pigeon<br>loft 1 | 2012 | Germany |
| HDZ 1007 | 45              | 4           | 14          | 18          | 22         | 8           | 5          | 13          | pigeon | feces from pigeon<br>loft 1 | 2012 | Germany |
| HDZ 1008 | 45              | 4           | 14          | 18          | 22         | 8           | 5          | 13          | pigeon | feces from pigeon<br>loft 1 | 2012 | Germany |
| 1458-1   | 48              | 13          | 8           | 19          | 10         | 15          | 16         | 4           | human  | unknown                     | 2013 | Germany |

| isolate  | allelic profile |             |             |             |            |             |            |             | origin | source                      | year | country |
|----------|-----------------|-------------|-------------|-------------|------------|-------------|------------|-------------|--------|-----------------------------|------|---------|
|          | ST              | <i>glgB</i> | <i>aroE</i> | <i>nifS</i> | <i>p20</i> | <i>uvrA</i> | <i>tkt</i> | <i>trpD</i> |        |                             |      |         |
| HDZ 1009 | 45              | 4           | 14          | 18          | 22         | 8           | 5          | 13          | pigeon | feces from pigeon<br>loft 2 | 2013 | Germany |
| HDZ 1011 | 45              | 4           | 14          | 18          | 22         | 8           | 5          | 13          | pigeon | feces from pigeon<br>loft 2 | 2013 | Germany |
| HDZ 1012 | 45              | 4           | 14          | 18          | 22         | 8           | 5          | 13          | pigeon | feces from pigeon<br>loft 2 | 2013 | Germany |
| HDZ 1015 | 49              | 15          | 8           | 8           | 11         | 9           | 1          | 1           | pigeon | feces from pigeon<br>loft 3 | 2013 | Germany |
| HDZ 1016 | 49              | 15          | 8           | 8           | 11         | 9           | 1          | 1           | pigeon | feces from pigeon<br>loft 3 | 2013 | Germany |
| HDZ 1017 | 49              | 15          | 8           | 8           | 11         | 9           | 1          | 1           | pigeon | feces from pigeon<br>loft 3 | 2013 | Germany |
| HDZ 1019 | 19              | 9           | 8           | 8           | 11         | 9           | 1          | 1           | pigeon | feces from pigeon<br>loft 4 | 2013 | Germany |



| isolate  | allelic profile |             |             |             |            |             |            |             | origin | source                      | year | country |
|----------|-----------------|-------------|-------------|-------------|------------|-------------|------------|-------------|--------|-----------------------------|------|---------|
|          | ST              | <i>glgB</i> | <i>aroE</i> | <i>nifS</i> | <i>p20</i> | <i>uvrA</i> | <i>tkl</i> | <i>trpD</i> |        |                             |      |         |
| HDZ 1020 | 19              | 9           | 8           | 8           | 11         | 9           | 1          | 1           | pigeon | feces from pigeon<br>loft 4 | 2013 | Germany |
| HDZ 1021 | 19              | 9           | 8           | 8           | 11         | 9           | 1          | 1           | pigeon | feces from pigeon<br>loft 4 | 2013 | Germany |
| HDZ 1022 | 19              | 9           | 8           | 8           | 11         | 9           | 1          | 1           | pigeon | feces from pigeon<br>loft 4 | 2013 | Germany |
| HDZ 1024 | 50              | 13          | 2           | 19          | 10         | 15          | 16         | 4           | turkey | feces from turkey<br>coop 1 | 2012 | Germany |
| HDZ 1025 | 50              | 13          | 2           | 19          | 10         | 15          | 16         | 4           | turkey | feces from turkey<br>coop 1 | 2012 | Germany |
| HDZ 1026 | 50              | 13          | 2           | 19          | 10         | 15          | 16         | 4           | turkey | feces from turkey<br>coop 1 | 2012 | Germany |
| HDZ 1027 | 50              | 13          | 2           | 19          | 10         | 15          | 16         | 4           | turkey | feces from turkey<br>coop 1 | 2012 | Germany |

| isolate  | allelic profile |             |             |             |            |             |            |             | origin | source                      | year | country |
|----------|-----------------|-------------|-------------|-------------|------------|-------------|------------|-------------|--------|-----------------------------|------|---------|
|          | ST              | <i>glgB</i> | <i>aroE</i> | <i>nifS</i> | <i>p20</i> | <i>uvrA</i> | <i>tkl</i> | <i>trpD</i> |        |                             |      |         |
| HDZ 1028 | 50              | 13          | 2           | 19          | 10         | 15          | 16         | 4           | turkey | feces from turkey<br>coop 1 | 2012 | Germany |
| HDZ 1029 | 50              | 13          | 2           | 19          | 10         | 15          | 16         | 4           | turkey | feces from turkey<br>coop 1 | 2012 | Germany |
| HDZ 1030 | 50              | 13          | 2           | 19          | 10         | 15          | 16         | 4           | turkey | feces from turkey<br>coop 1 | 2012 | Germany |
| HDZ 1031 | 50              | 13          | 2           | 19          | 10         | 15          | 16         | 4           | turkey | feces from turkey<br>coop 1 | 2012 | Germany |
| HDZ 1032 | 50              | 13          | 2           | 19          | 10         | 15          | 16         | 4           | turkey | feces from turkey<br>coop 1 | 2012 | Germany |

2 <sup>1</sup> “National Reference Center of Streptococci Institute of Medical Microbiology, University Hospital (RWTH)”, Aachen

3 <sup>2</sup> “Servicio de Microbiología, Instituto Ramón y Cajal de Investigación Sanitaria (IRYCIS), Hospital Universitario Ramón y Cajal”,

4 Madrid

5 <sup>3</sup> „LADR GmbH MVZ Dr. Kramer & Colleagues, Geesthacht“
