# Supplementary material
Source: PubMed Central journal article supplement (PMC4097760)
Supplement: JCM.03329-13_zjm999093524so2.pdf [file JCM.03329-13_zjm999093524so2.pdf]

1

2 **Supplementary Table 2:** Oligonucleotide primer pairs for PCR and sequencing

| <b>gene</b> | <b>forward primer 5'-3'</b> | <b>reverse primer 5'-3'</b> | <b>amplified<br/>size [bp]</b> | <b>compared<br/>size [bp]</b> |
|-------------|-----------------------------|-----------------------------|--------------------------------|-------------------------------|
| <i>aroE</i> | CCTACGCTTGTAGCATTG          | CTTAGCTGCGGTTGTTG           | 596                            | 458                           |
| <i>glgB</i> | CAGCAGCAGTTCTTACAG          | ACCGTGAACCACTTCATC          | 950                            | 491                           |
| <i>nifS</i> | GATTCGGACAGCTGATTG          | GTCTGGTGGTACAGAAAG          | 859                            | 738                           |
| <i>p20</i>  | TATTTACGCCACGTCTG           | CATAGCGCAATAGGTCAC          | 493                            | 394                           |
| <i>tkt</i>  | GTCAAACGGTGGATACTC          | CCGAATACGGTCATACTG          | 550                            | 441                           |
| <i>trpD</i> | CGACGCCATGTGTAATTG          | AAGGTAAGGGCTAGGTTC          | 643                            | 418                           |
| <i>uvrA</i> | CTCGCAAGGTACGTAAAC          | GGCAACACCTTGATTGTC          | 675                            | 517                           |

3

4
